# Supplementary material for: Massively parallel quantification of the regulatory effects of noncoding genetic variation in a human cohort
Source: HighWire-hosted journal article supplement (doi:10.1101/gr.190090.115), 2015-06-17
Supplement: Supplemental_Information.docx [file Supplemental_Information.docx]

**Supplemental Figures**


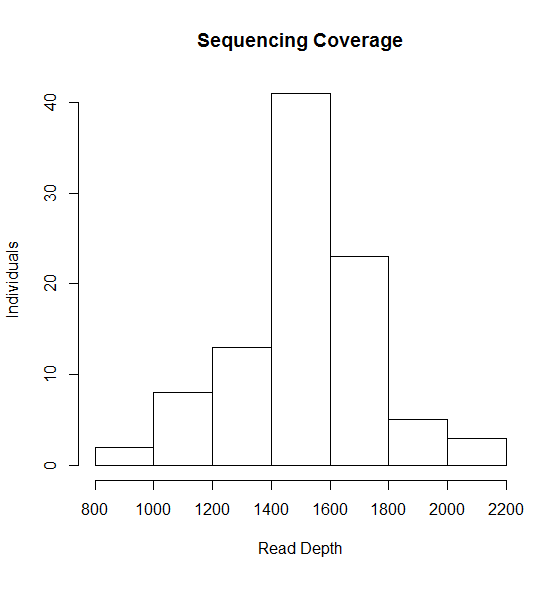


**Supplemental Figure 1:** Distribution of TruSeq Custom Amplicon sequencing coverage for 95 individuals. For each individual, the read depth was determined by calculating the median coverage per amplicon for that specific individual. The median read depth for an individual in the cohort is 1500x.


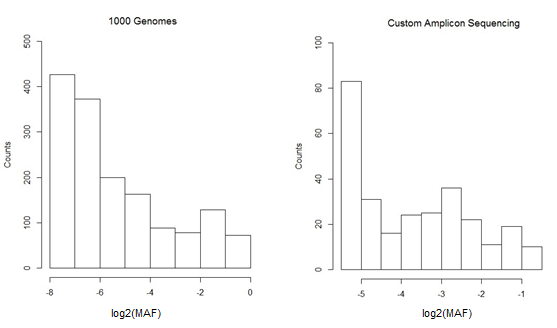


**Supplemental Figure 2:** Distribution of allele frequencies in the 1000 Genomes Project and our TruSeq Custom Amplicon Sequencing for 95 individuals. The high coverage permitted confidently calling a higher number of private variants per individual.


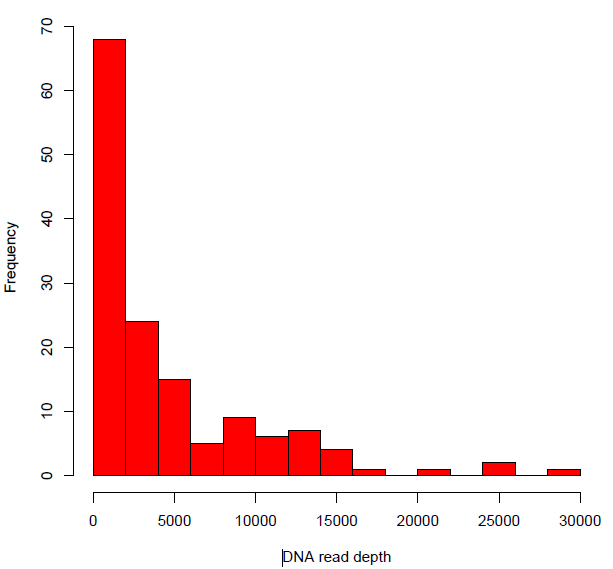


**Supplemental Figure 3:** Distribution of median coverage per amplicon of STARR-seq DNA plasmid input library sequencing. The Y-axis represents the number of amplicons and the X-axis represents the median depth per fragment. The median number of times an amplicon was sequenced was 2200 times.


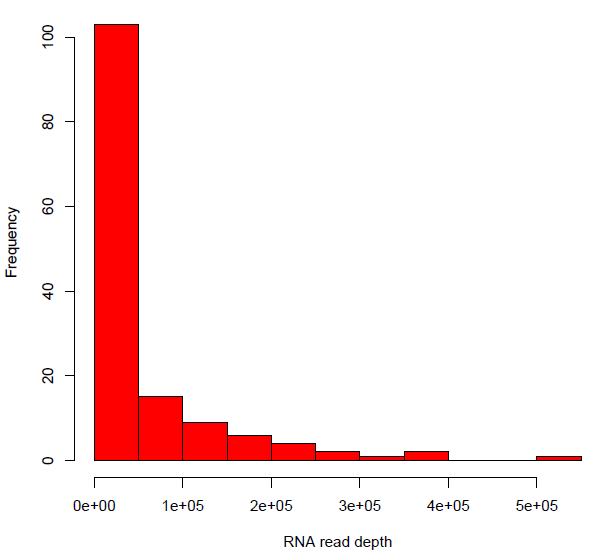


**Supplemental Figure 4:** Distribution of median coverage per amplicon of the RNA-seq output library sequencing. The Y-axis represents the number of amplicons and the X-axis represents the median depth per fragment. The median number of times an amplicon was sequenced was 13,000 times.


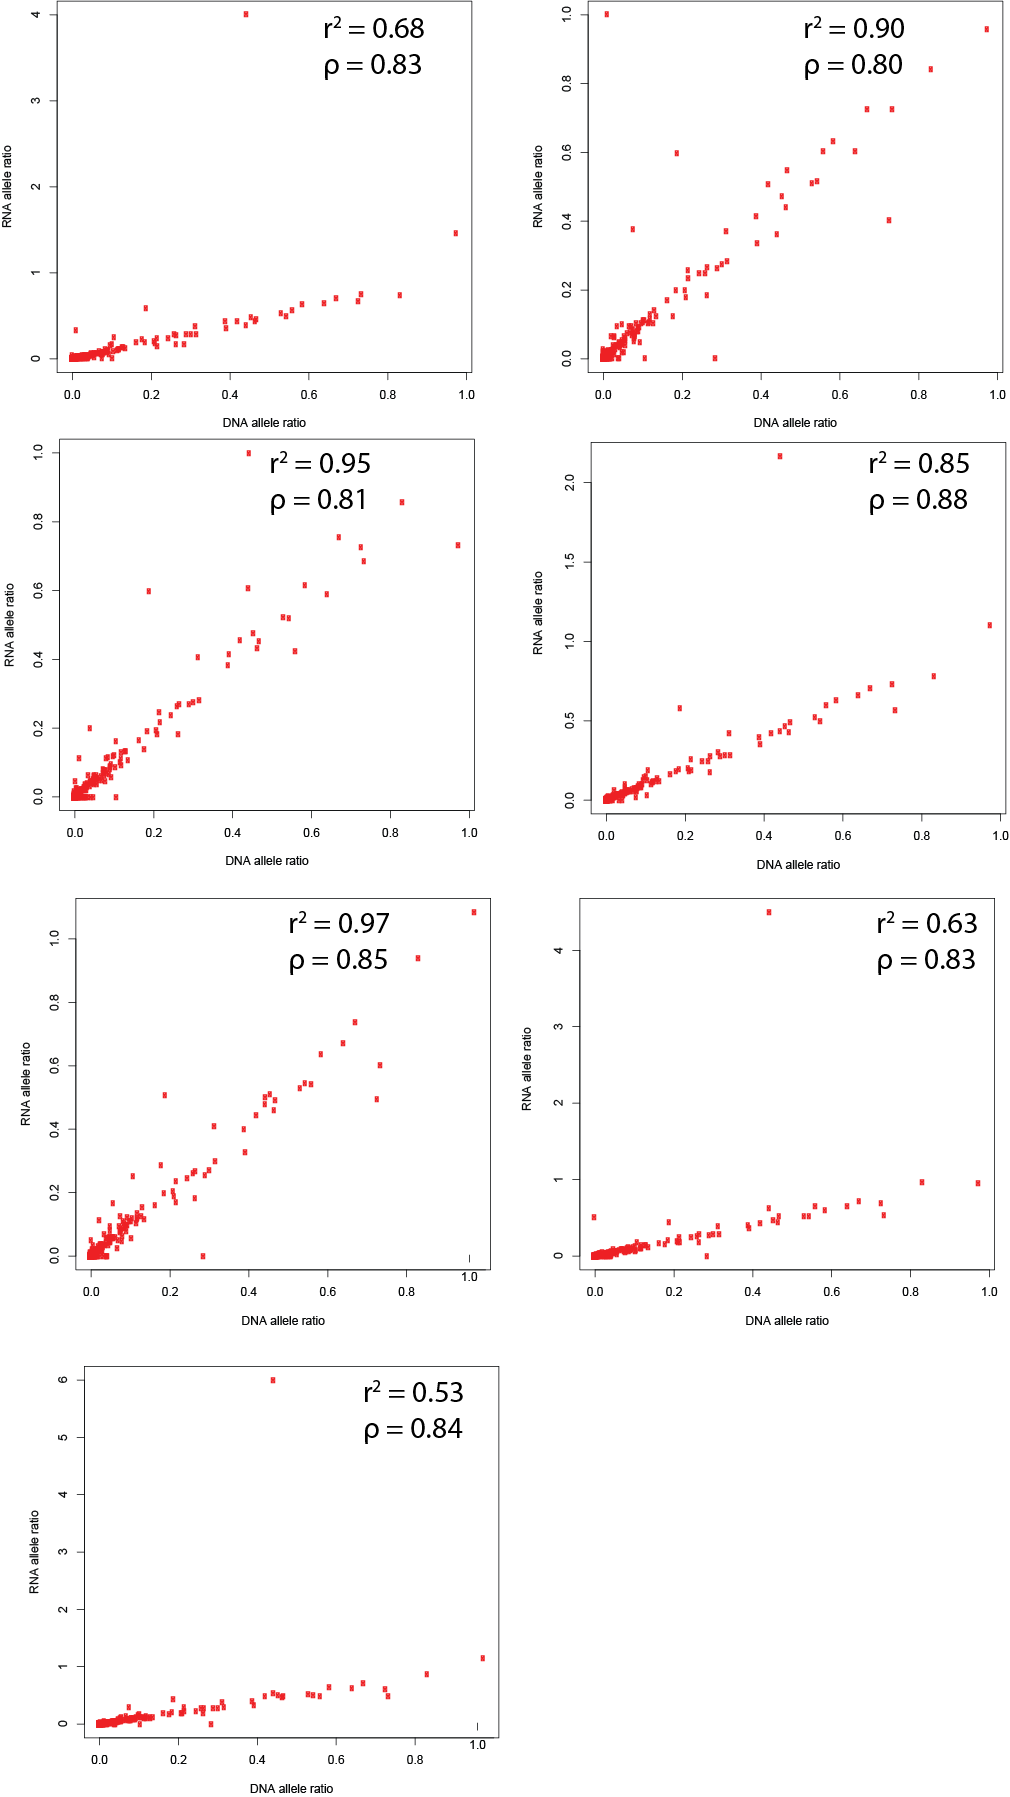


**Supplemental Figure 5:** Allele ratio in the DNA plasmid library (X-axis) versus allele ratio in RNA-seq output libraries (Y-axis) for each replicate. Allele ratio is defined as (number of reads containing Allele0) / (number of reads containing Allele1). Allele0 is the reference allele and Allele1 is the alternate allele defined by the VCF file. Generally, the alternative allele has lower frequency, although this is not always the case.


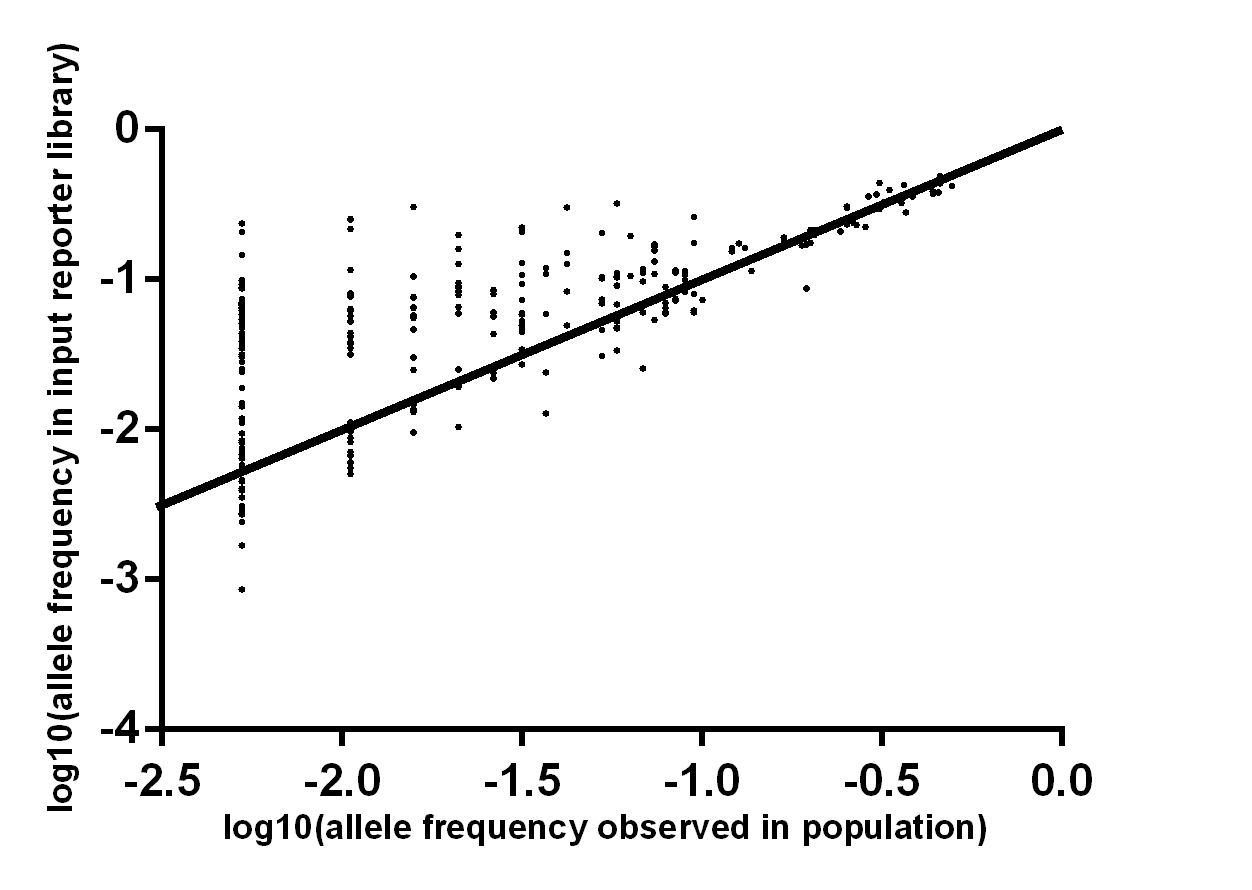


**Supplemental Figure 6:** Plotted is a comparison of the allele frequency of each SNP in the cohort DNA determined by variant calling to the allele frequency of each SNP in the resulting reporter library. Allele frequencies of the cohort DNA used are shown on the X-axis; and the allele frequency in the resulting reporter library are on the Y-axis.


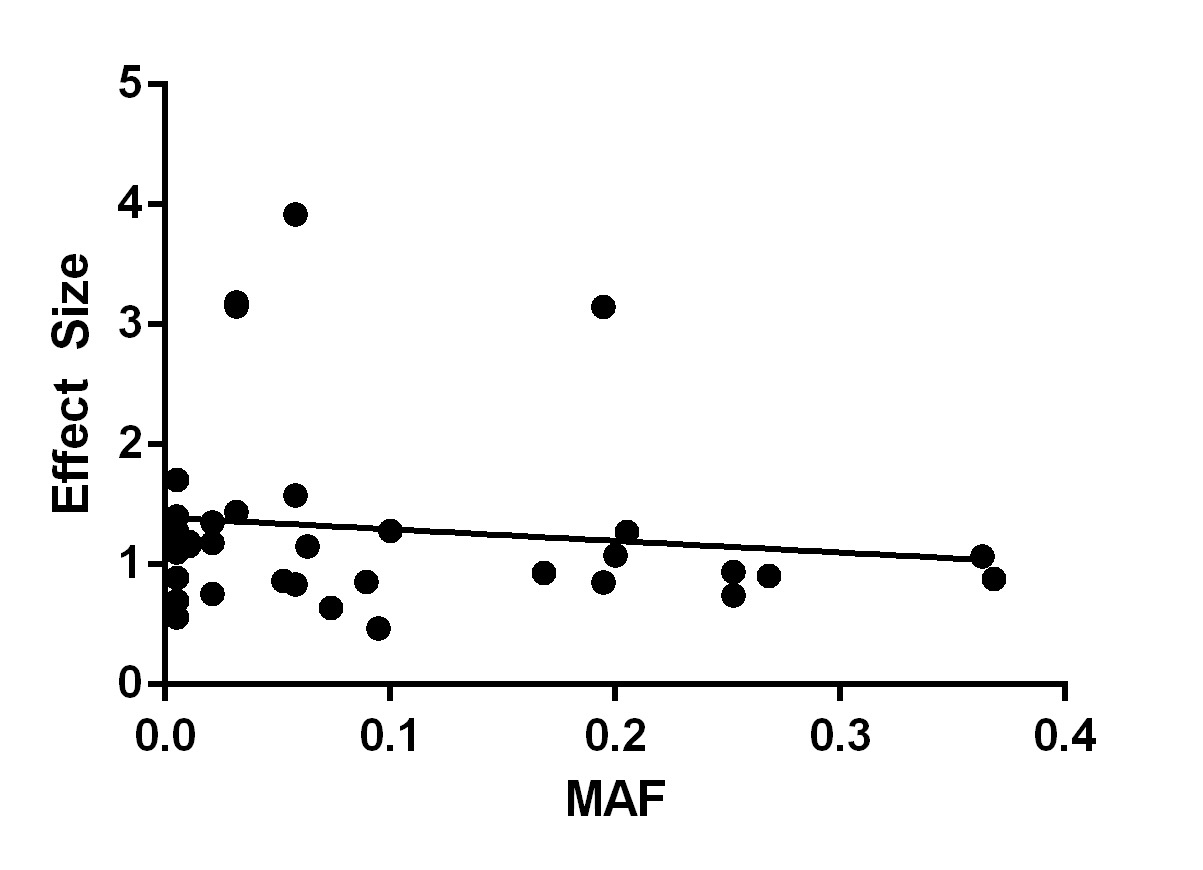


**Supplemental Figure 7:**  Correlation between minor allele frequency (MAF: X-axis) and variant effect size (Y-axis) for functional variants identified in our population STARR-seq assay (Spearman ρ = -0.18, p = 0.28).


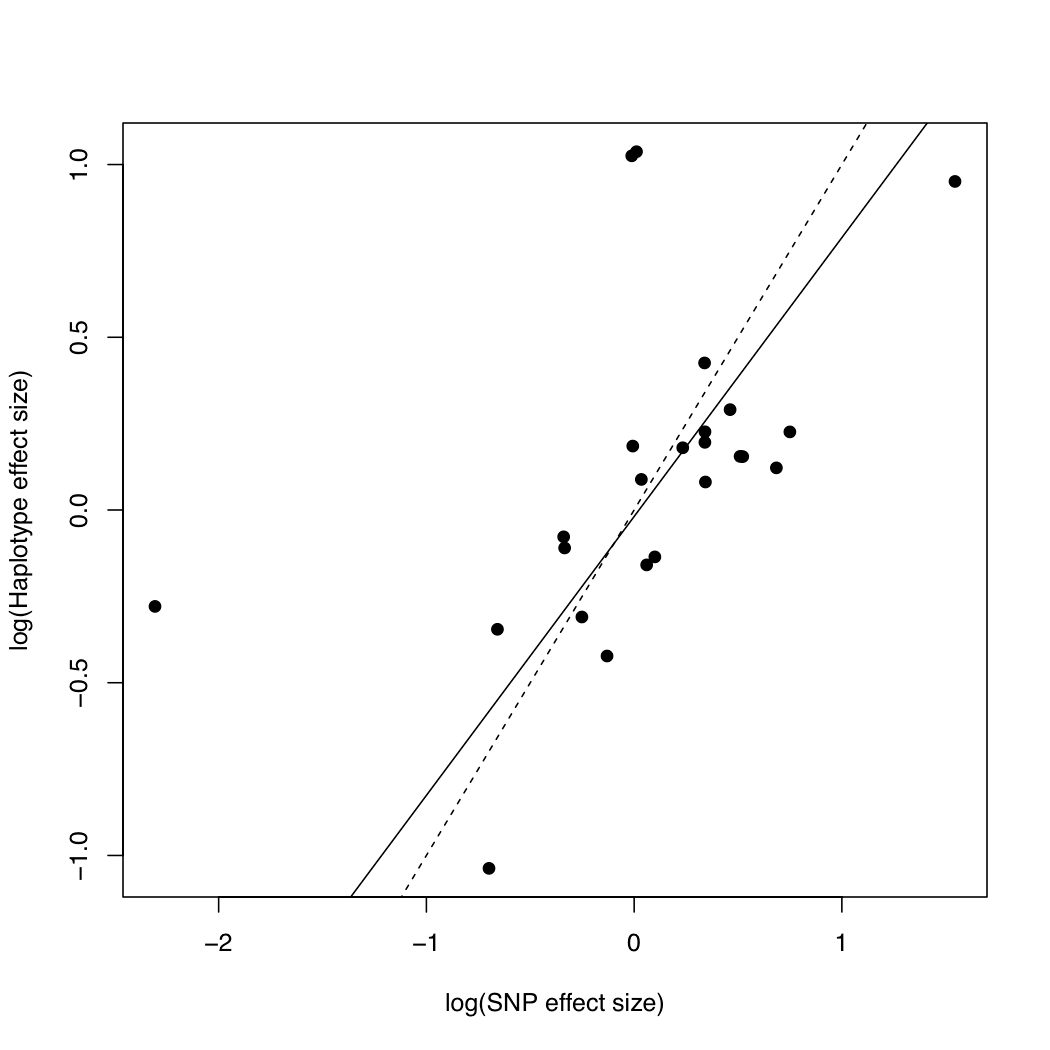


**Supplemental Figure 8:**  Correlation between SNP effect sizes (X-axis: log of product of effect sizes of SNPs on haplotype) and log of observed haplotype effects (Y-axis) for putative regulatory haplotypes containing more than one SNP (r = 0.54, p = 0.007). Observed haplotype effect sizes were computed as normalized ratios for each haplotype versus all pooled haplotypes at a locus: (RNAhaplotype/DNAhaplotype)/(RNApooled/DNApooled). Solid line: regression line (slope=0.8, intercept=-0.019); dotted line: 1:1 diagonal.


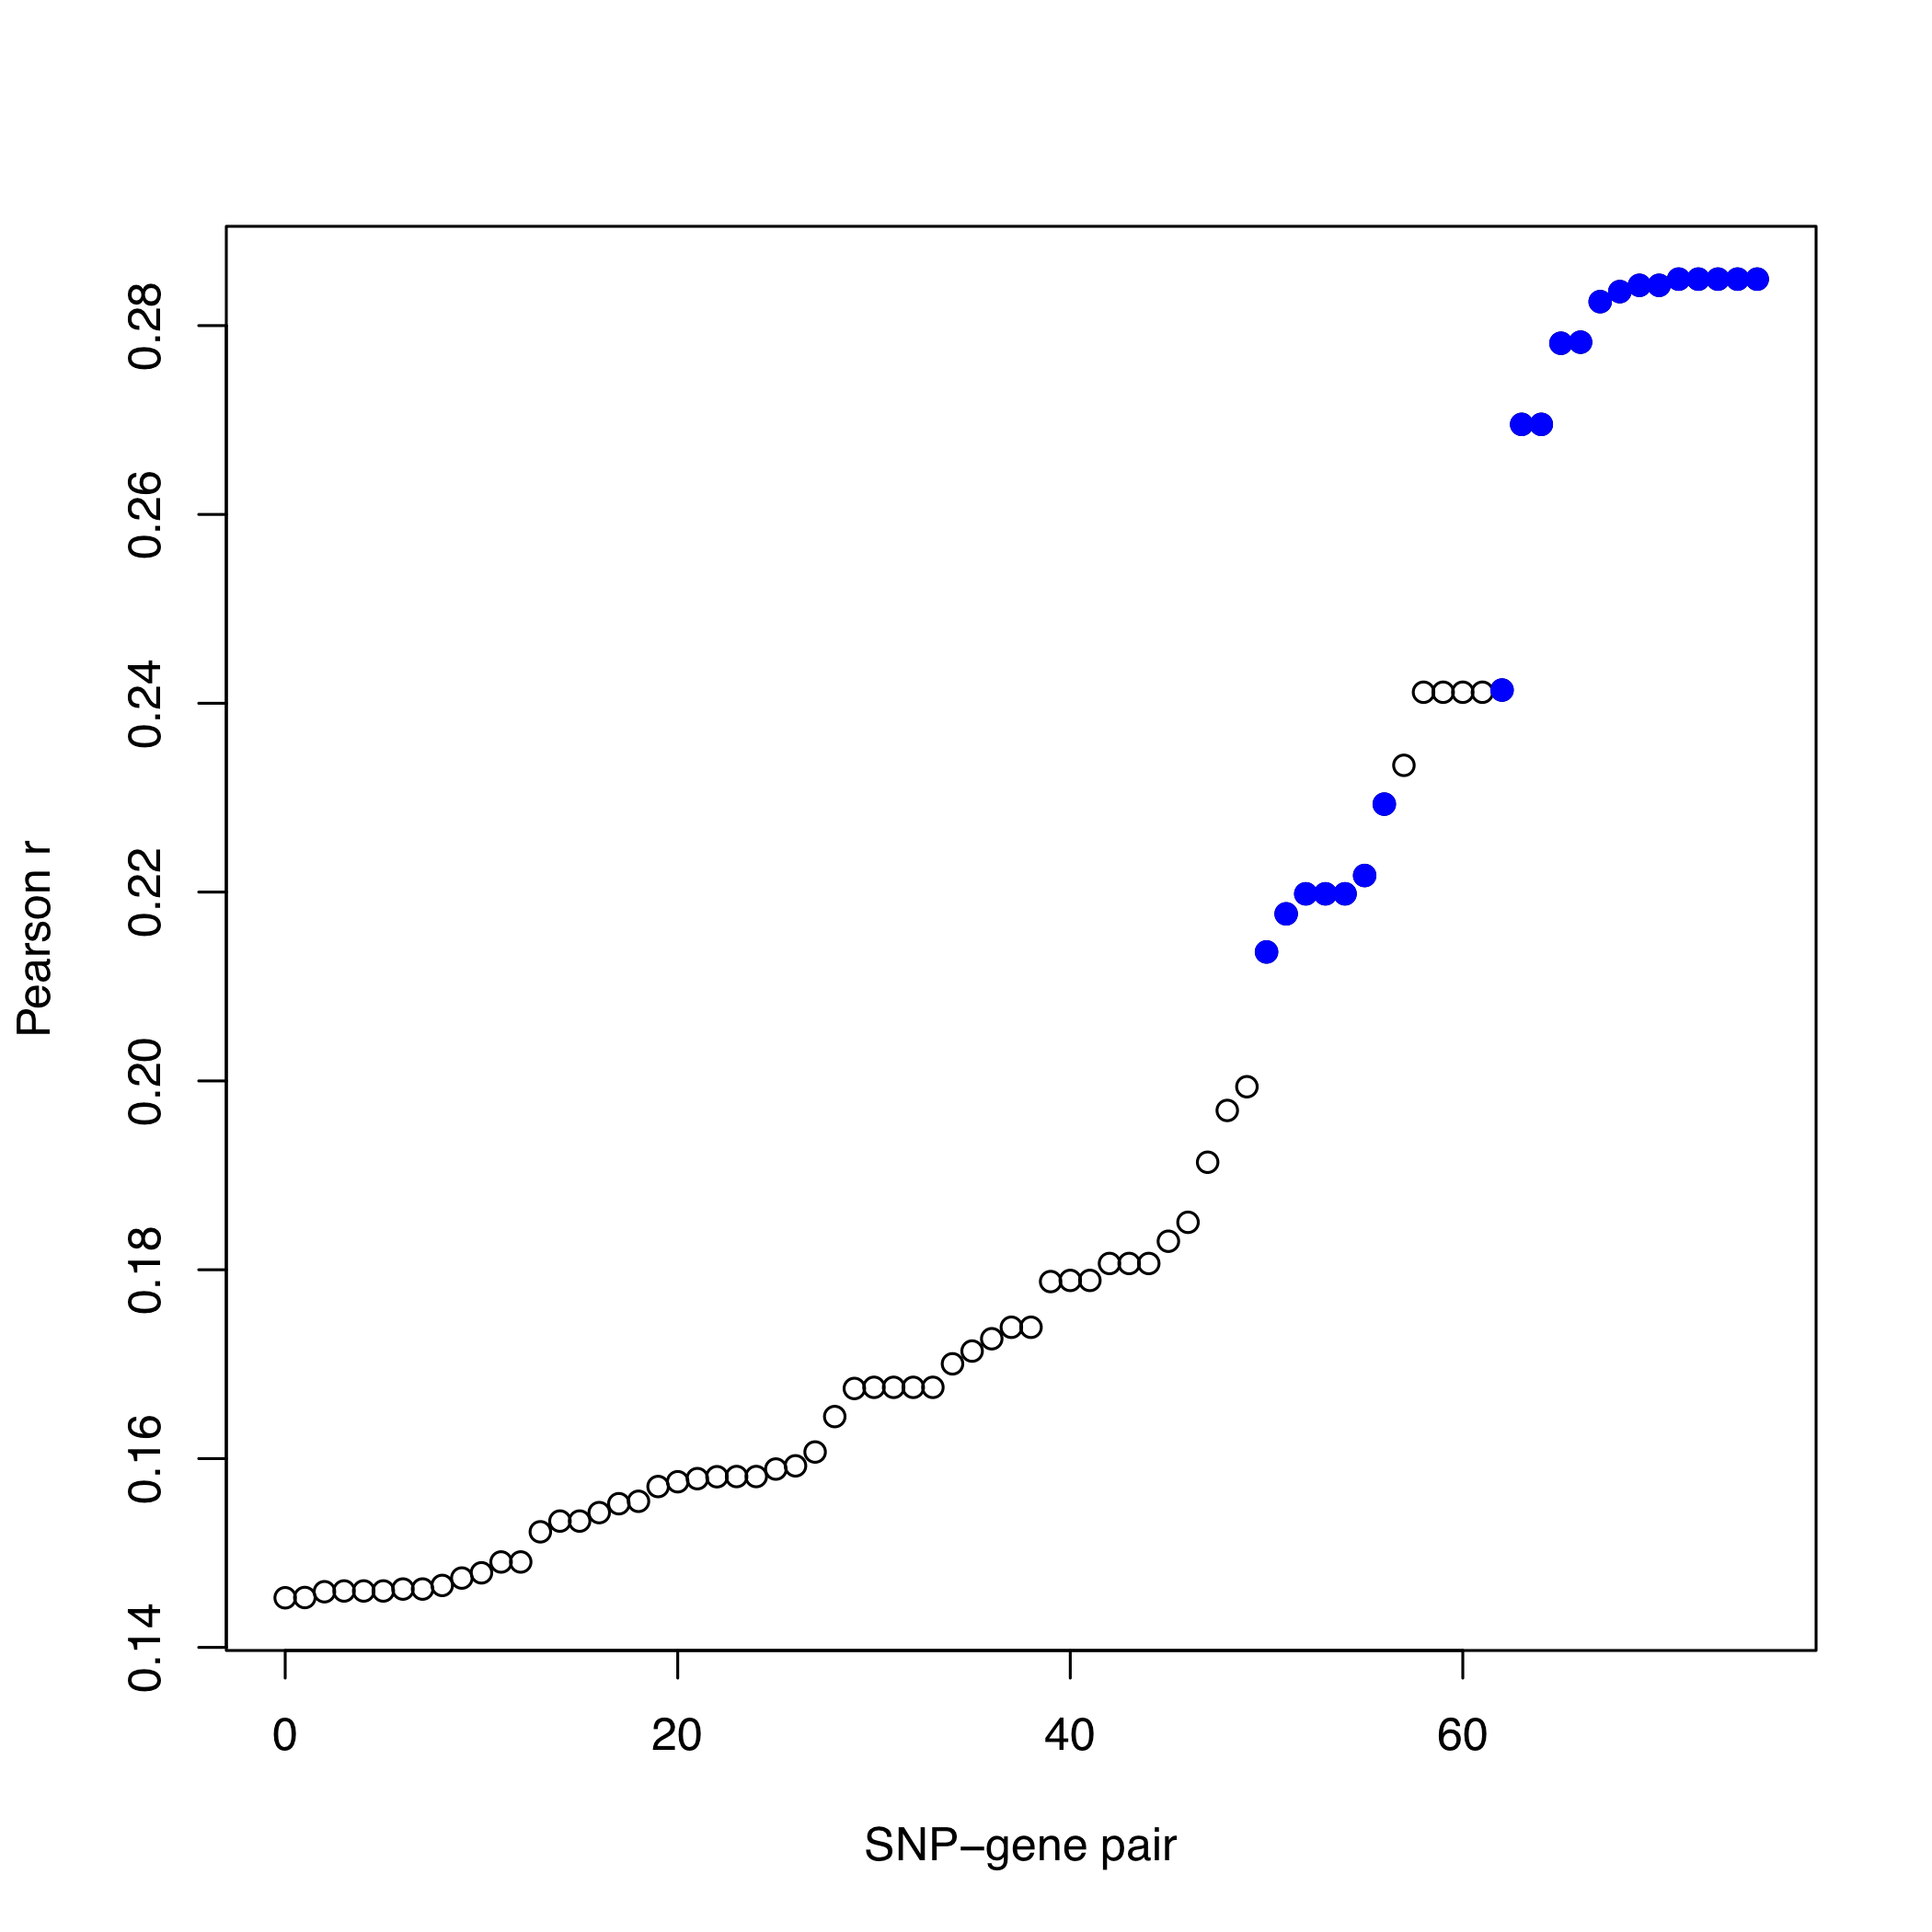
**Supplemental Figure 9:** Pearson correlation coefficients for five genes (*LINC00881*:ENSG00000241135.1, *LINC00880*:ENSG00000243629.1, *CCNL1*:ENSG00000163660.7, *TIPARP*:ENSG00000163659.8, *LEKR1*:ENSG00000197980.6) and 67 proximal SNPs. Blue points correspond to eQTLs for *LINC00881* as defined by the GEUVADIS consortium and shown in Fig. 2C.

**Supplemental Tables**

**Supplemental Table 1: Transition:Transversion ratios in 1000 Genomes and Custom Amplicon Sequencing**

|  | **1000 genomes** | **Custom Amplicon Sequencing** |
| --- | --- | --- |
| **Exons** | 2.71 | 2.83 |
| **DHS Peaks** | 2.36 | 2.31 |
| **DHS Peak middle** | 2.65 | 2.63 |
| **DHS Peak edges** | 2.25 | 2.18 |
| **Non DHS Intergenic** | 1.61 | 1.97 |
| **Overall** | 2.02 | 2.17 |

**Supplemental Table 2: Proportion of assayed variation in Population STARR-seq**

|  | **Number of Fragments Sequenced** | **Number of Variants Called** |
| --- | --- | --- |
| **Custom Amplicon Assay** | 174 | 321 |
| **Population STARR-seq** | 173 | 283 |
| **Percent** | 99.42528736 | 88.16199377 |

**Supplemental Table 3: STARR-seq Primers**

| TS2SSF: | TAGAGCATGCACCGGACACTCTTTCCCTACACGACGCTCTTCCGATCT |
| --- | --- |
| TS2SSpatientR: | GGCCGAATTCGTCGATCGCGAGTTAATGCAACGATCGTCGAAATTCGC |
| PPRead2 | TCGCGAGTTAATGCAACGATCGTCGAAATTCGC |
| PPBCread | GCGAATTTCGACGATCGTTGCATTAACTCGCGA |
| PPBC1 | CAAGCAGAAGACGGCATACGAGATCGTGATTCGCGAGTTAATGCAACGATCGTCGAAATTCG*C |
| PPBC2 | CAAGCAGAAGACGGCATACGAGATACATCGTCGCGAGTTAATGCAACGATCGTCGAAATTCG*C |
| PPBC3 | CAAGCAGAAGACGGCATACGAGATGCCTAATCGCGAGTTAATGCAACGATCGTCGAAATTCG*C |
| PPBC4 | CAAGCAGAAGACGGCATACGAGATTGGTCATCGCGAGTTAATGCAACGATCGTCGAAATTCG*C |
| PPBC5 | CAAGCAGAAGACGGCATACGAGATCACTGTTCGCGAGTTAATGCAACGATCGTCGAAATTCG*C |
| PPBC6 | CAAGCAGAAGACGGCATACGAGATATTGGCTCGCGAGTTAATGCAACGATCGTCGAAATTCG*C |
| PPBC7 | CAAGCAGAAGACGGCATACGAGATGATCTGTCGCGAGTTAATGCAACGATCGTCGAAATTCG*C |
| PPBC8 | CAAGCAGAAGACGGCATACGAGATTCAAGTTCGCGAGTTAATGCAACGATCGTCGAAATTCG*C |
| PPBC9 | CAAGCAGAAGACGGCATACGAGATCTGATCTCGCGAGTTAATGCAACGATCGTCGAAATTCG*C |
|  | *= phosphorothioate bond. |

**Supplemental Table 4: Luciferase Validation Primers**

| chr3 156800768 F | CTGGCCTAACTGGCCGGTACCCCAGCCTGTGTGGATGTTGC |
| --- | --- |
| chr3 156806431 F | CTGGCCTAACTGGCCGGTACCGGGGAAGATCAGGGGATGAA |
| chr3 156812738 F | CTGGCCTAACTGGCCGGTACCAGTTCGTTTTCCGGGGGTGA |
| chr3 156852592 F | CTGGCCTAACTGGCCGGTACCTGACAGCCCCCTCTAGTGCAG |
| chr3 156878129 F | CTGGCCTAACTGGCCGGTACCCGGCAGCAGTAGCTGTCGAA |
| chr3 156898104 F | CTGGCCTAACTGGCCGGTACCTTCTGTAGATGATTGAAATATTTTGGA |
| chr3 156800768 R | TACCCTAGGGAGATCTCCCTTGTCCCCAGGAAGCTC |
| chr3 156806431 R | TACCCTAGGGAGATCTCTCTTCCCGCTCGCAGCA |
| chr3 156812738 R | TACCCTAGGGAGATCTTGAGGGAGCTGTCTTCAGTTCAGA |
| chr3 156852592 R | TACCCTAGGGAGATCTGCATCAGTTGAGCTGAGGGACA |
| chr3 156878129 R | TACCCTAGGGAGATCTCCGCCACTTCCCTTGGTACA |
| chr3 156898104 R | TACCCTAGGGAGATCTCTTCATGGAGAGGTGGAGGA |

**Supplemental Data**

**Supplemental Data 1: Amplicon Probe Coordinates**

**Supplemental Data 2: DHS coordinates**

**Supplemental Data 3: Phased VCF file for 95 individuals**

**Supplemental Data 4: Variant effect sizes determined using population STARR-seq**

**Supplemental Data 5: Enhancer Activity Scores for Significant Functional Variants**

**Supplemental Data 6: Enhancer Activity Scores for Non-significant Variants**

**Supplemental Data 7: Haplotype Sequences**

**Supplemental Data 8: Haplotype Effects**
